# Supplementary material
Source: PubMed Central journal article supplement (PMC3807357)
Supplement: JVI.01681-13_zjv999098188so1.pdf [file JVI.01681-13_zjv999098188so1.pdf]

## Supporting Information

### **A functional gp41-gp120 interaction is observed in monomeric, but not trimeric, uncleaved HIV Env gp140**

Miklos Guttman<sup>1</sup>, Kelly K. Lee<sup>1#</sup>

<sup>1</sup> Department of Medicinal Chemistry; University of Washington, Seattle, WA 98195

<sup>#</sup> Address correspondence to: [kklee@uw.edu](mailto:kklee@uw.edu); 206-616-3496; 206-685-3252 (fax)

#### List of Figures:

- 1) H/DX plots of individual peptides (SF162)
- 2) H/DX plots of individual peptides (QH0692)
- 3) H/DX plots of individual peptides (92UG37)

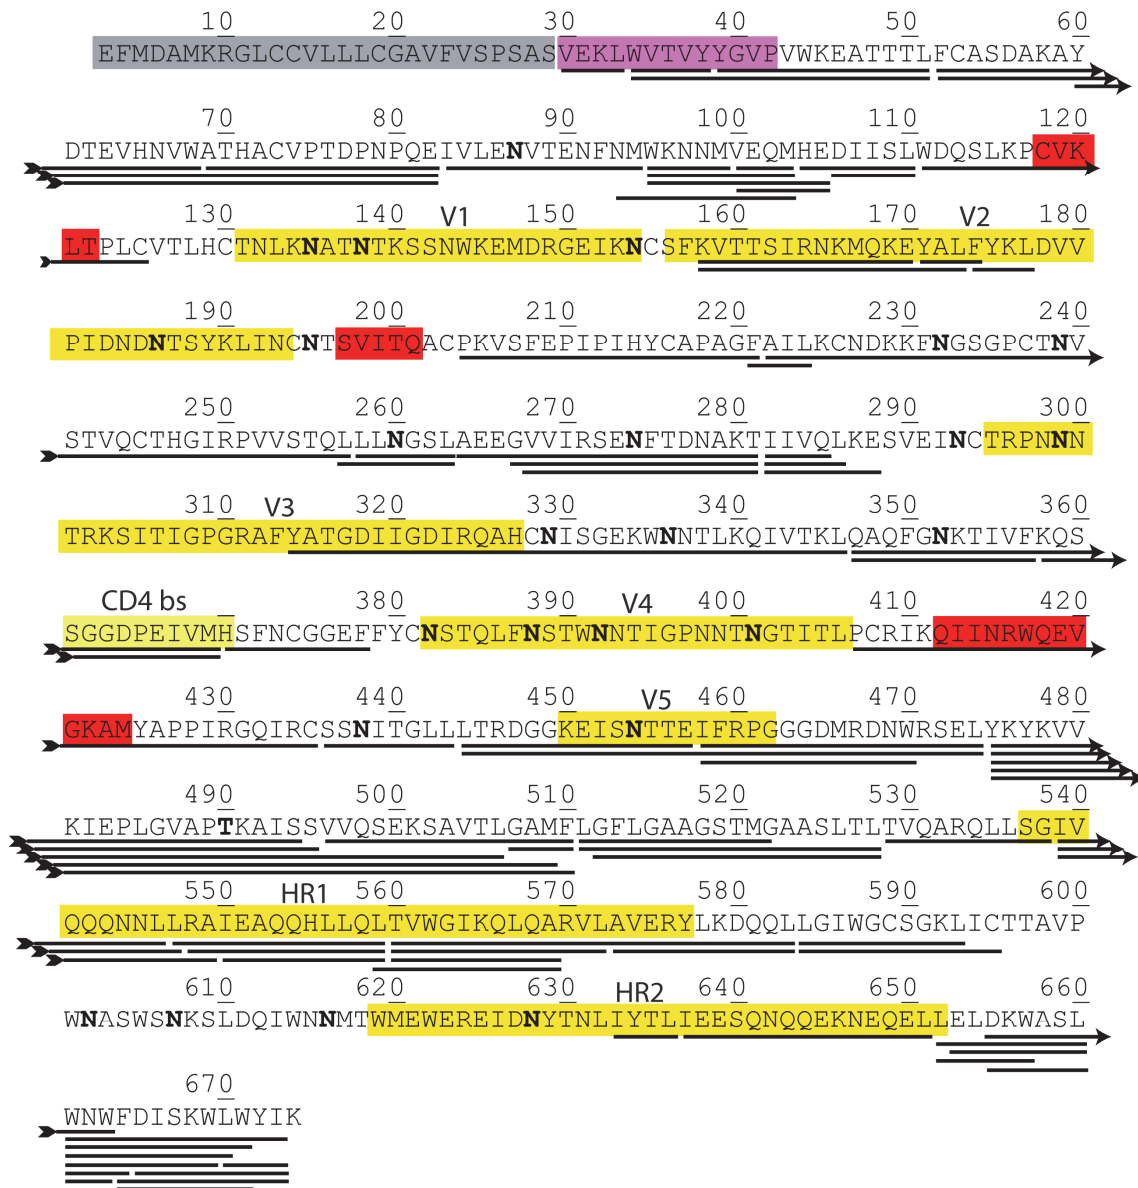

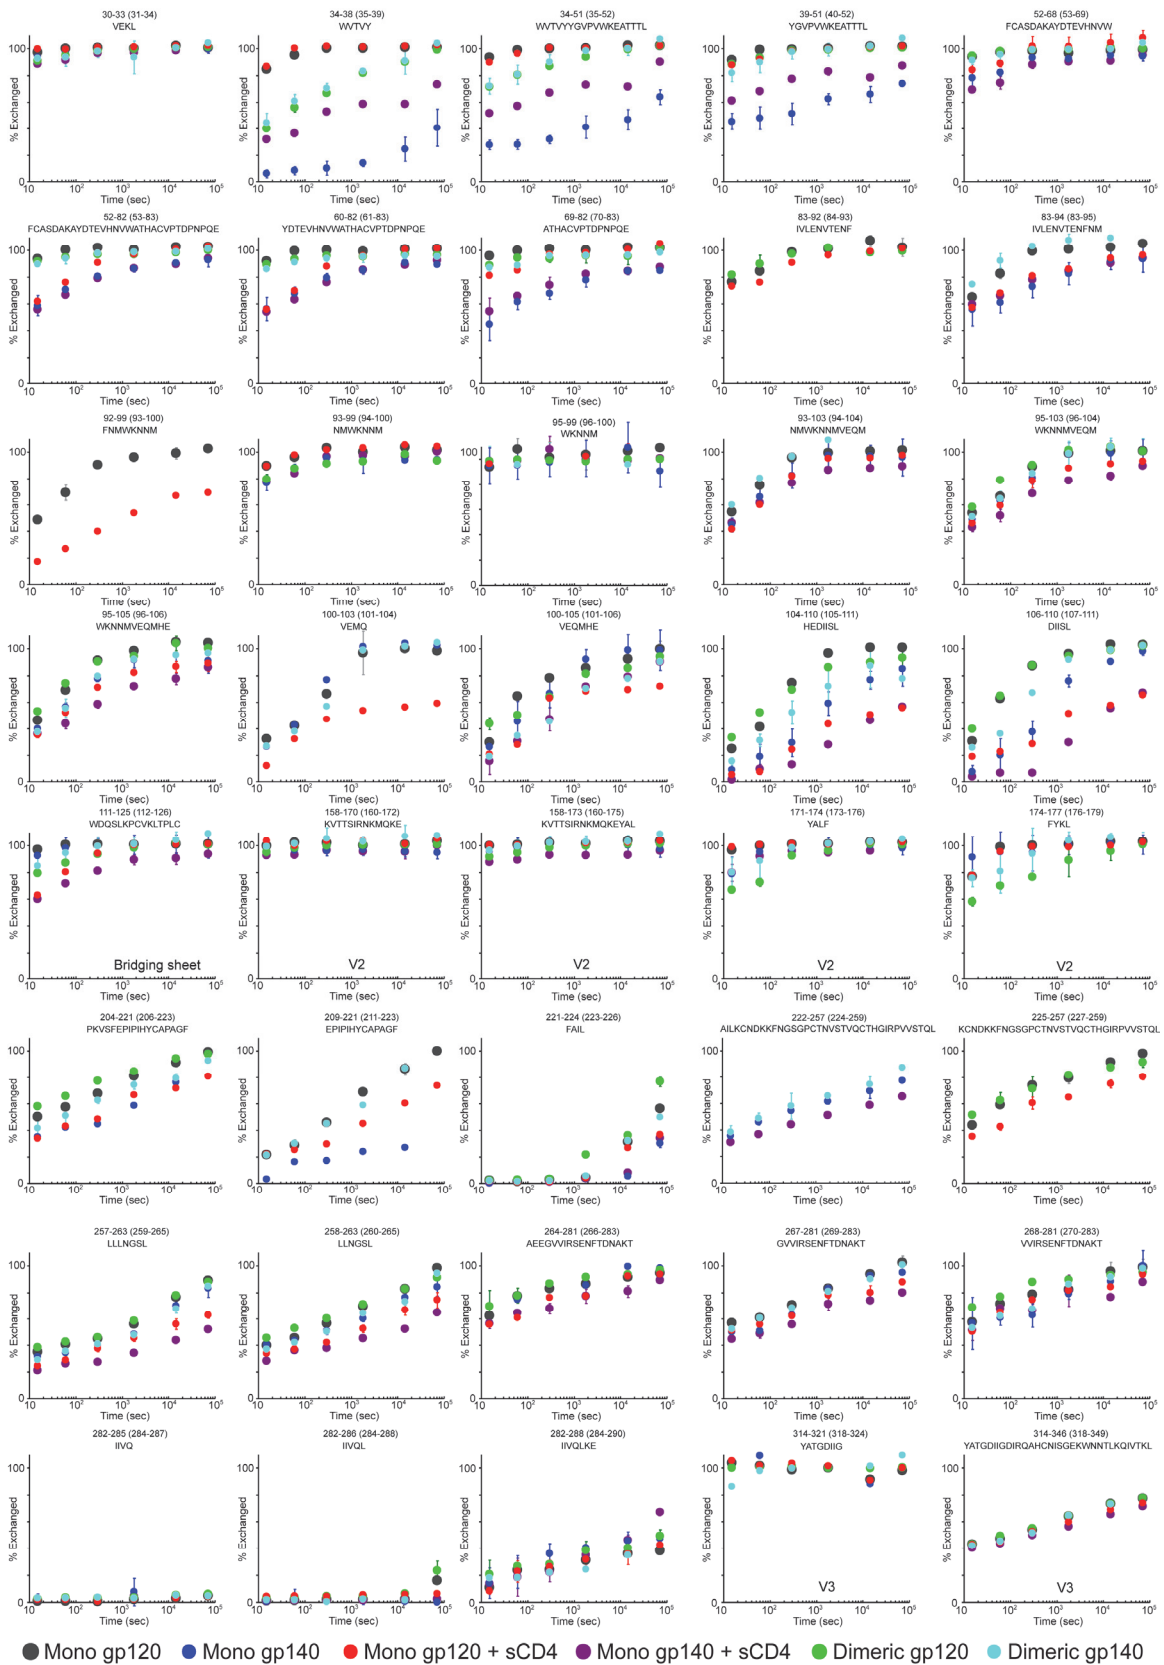

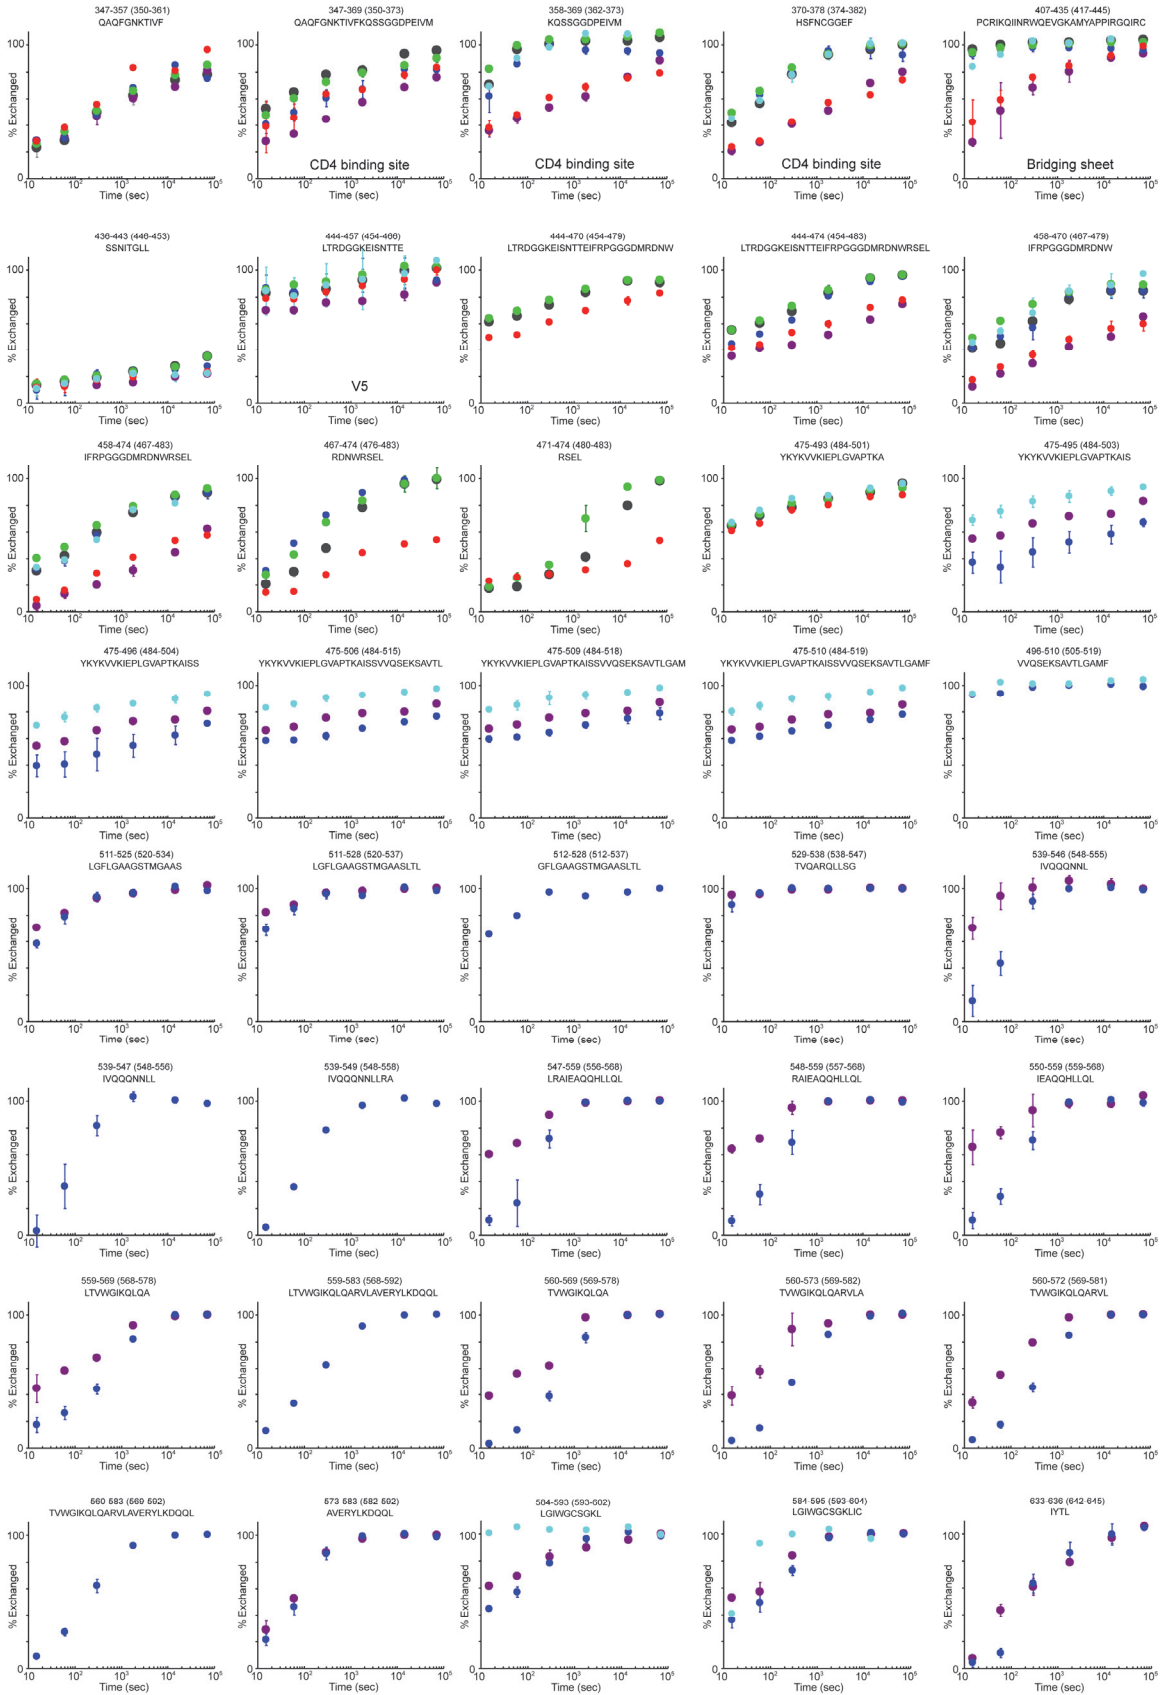

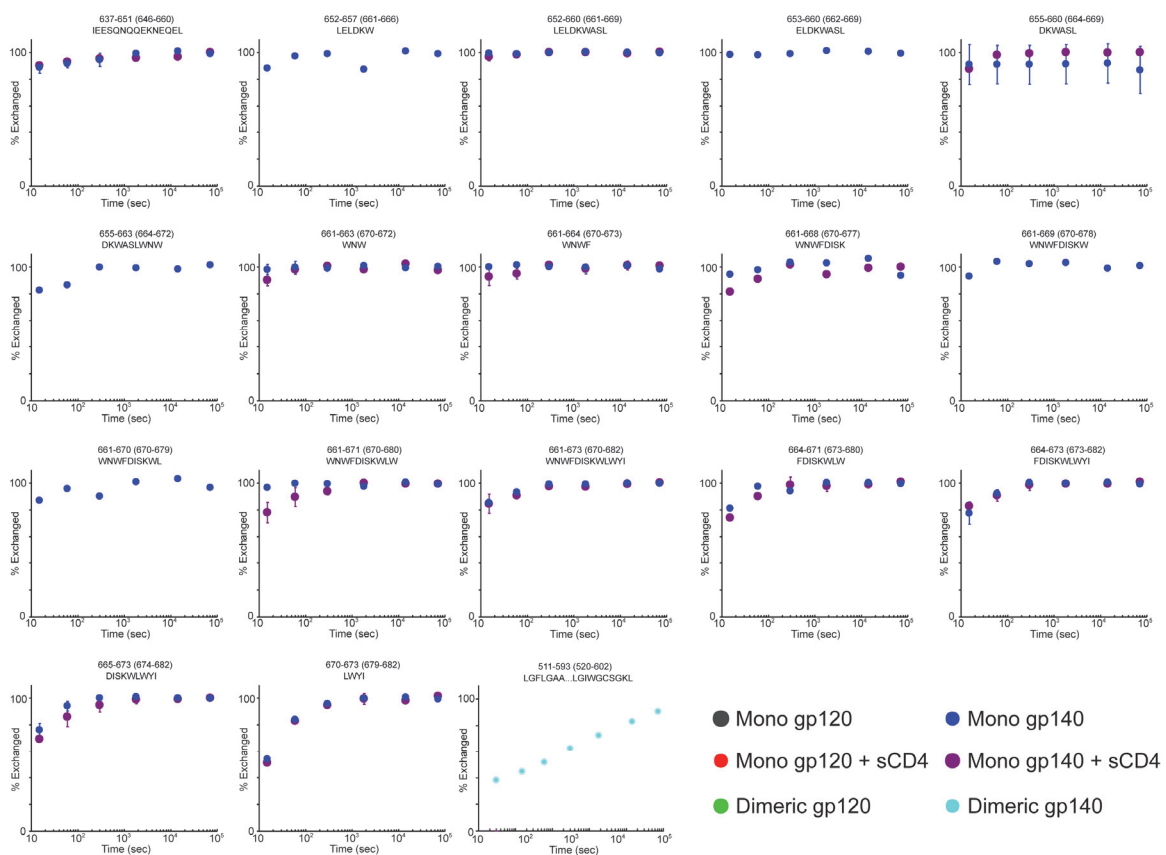

Figure S1: Peptic coverage of gp140 isolate SF162 (top). Observable fragments are shown as lines under the primary sequence. The leader sequence (absent from the mature protein) is shown in grey. Variable loops 1-5, the CD4 binding site, and HR1/HR2 are highlighted and potential N-linked glycosylation sites are indicated in bold. Segments of the bridging sheet are highlighted in red, and the N-terminal extension in pink. Percent exchange is shown for each peptide in monomeric gp120 (grey), monomeric gp120+sCD4 (red), dimeric gp120 (green), monomeric gp140 (blue), monomeric gp140+sCD4 (purple), and dimeric gp140 (cyan) as a function of time. Error bars represent standard deviations from duplicate measurements and as well as multiple observed peptide charge states. Numbering in parenthesis refers to HXB2 numbering.

10 20 30 40 50 60  
 MDAMKRG LCCV LLLCGAVFVSPSAS ENLWVT VYYGVF VWKEATTTLFCASDAKAY  
 70 80 90 100 110 120  
 ETEKHNVWATHACVPTDPNPQEVVLGNVTENFNMWKNMVEQM HEDIISLWDESLK PCVK  
 130 140 V1 150 160 170 V2 180  
 LTPLCVTLNCTDEVKTSYANKTSNETYKTSNETFGEIKNC SFSVPTGIKDKVQNVYALFY  
 190 200 210 220 230 240  
 KLDVIPIDDNNSSKNNNGSYSSYRLINNTSVITQACPKVSFEPIPIHYCAPAGFAILK  
 250 260 270 280 290 300  
 CNNKTFNGTGPCTNVSTVQCTHGIRPVVSTQ LLLNGSLAE EEVVIRSENFTNNAKTIIVH  
 310 320 V3 330 340 350 360  
 LKKSVEINC TRPGNNTRKSIHIGPGRAFYATGDIIGDIRQAH CNLSSVQWNTDLKQIVIK  
 370 CD4 bs 390 400 410 V4 420  
 LGEQFGT NKTIAFNQSSGGDP EIVMHSFNCGGEFFYC NTTQLFNSTWEFHGNWTRSNFTE  
 430 440 450 460 470 V5 480  
 SNSTTITLPCRIKQIVNMWQEVGKAMYAPPIRGQIRCSSNITG LLLTRDGGVNGTRETFR  
 490 500 510 520 530 540  
 PGGGDMRDNRSELYKYKVVKIEPLGVAPT KAKSSVVQSEKSAVGTIGAMFLGFLGAAGS  
 550 560 570 HR1 580 590 600  
 TMGAASITLTVQARQLLSGIVQQQNNLLRAIEAQQHMLQLTVWG IKQLQARVLAVERYLR  
 610 620 630 640 650 HR2 660  
 DQQLLGIWGC SGKLICTTAVPWNASWSNKSQDIY WNNMTWMQWDKEINNYTNLIYS LLED  
 670 680 690  
 SQNQQEKNEHELLELDK WASLWNWFDITRWLWYIK

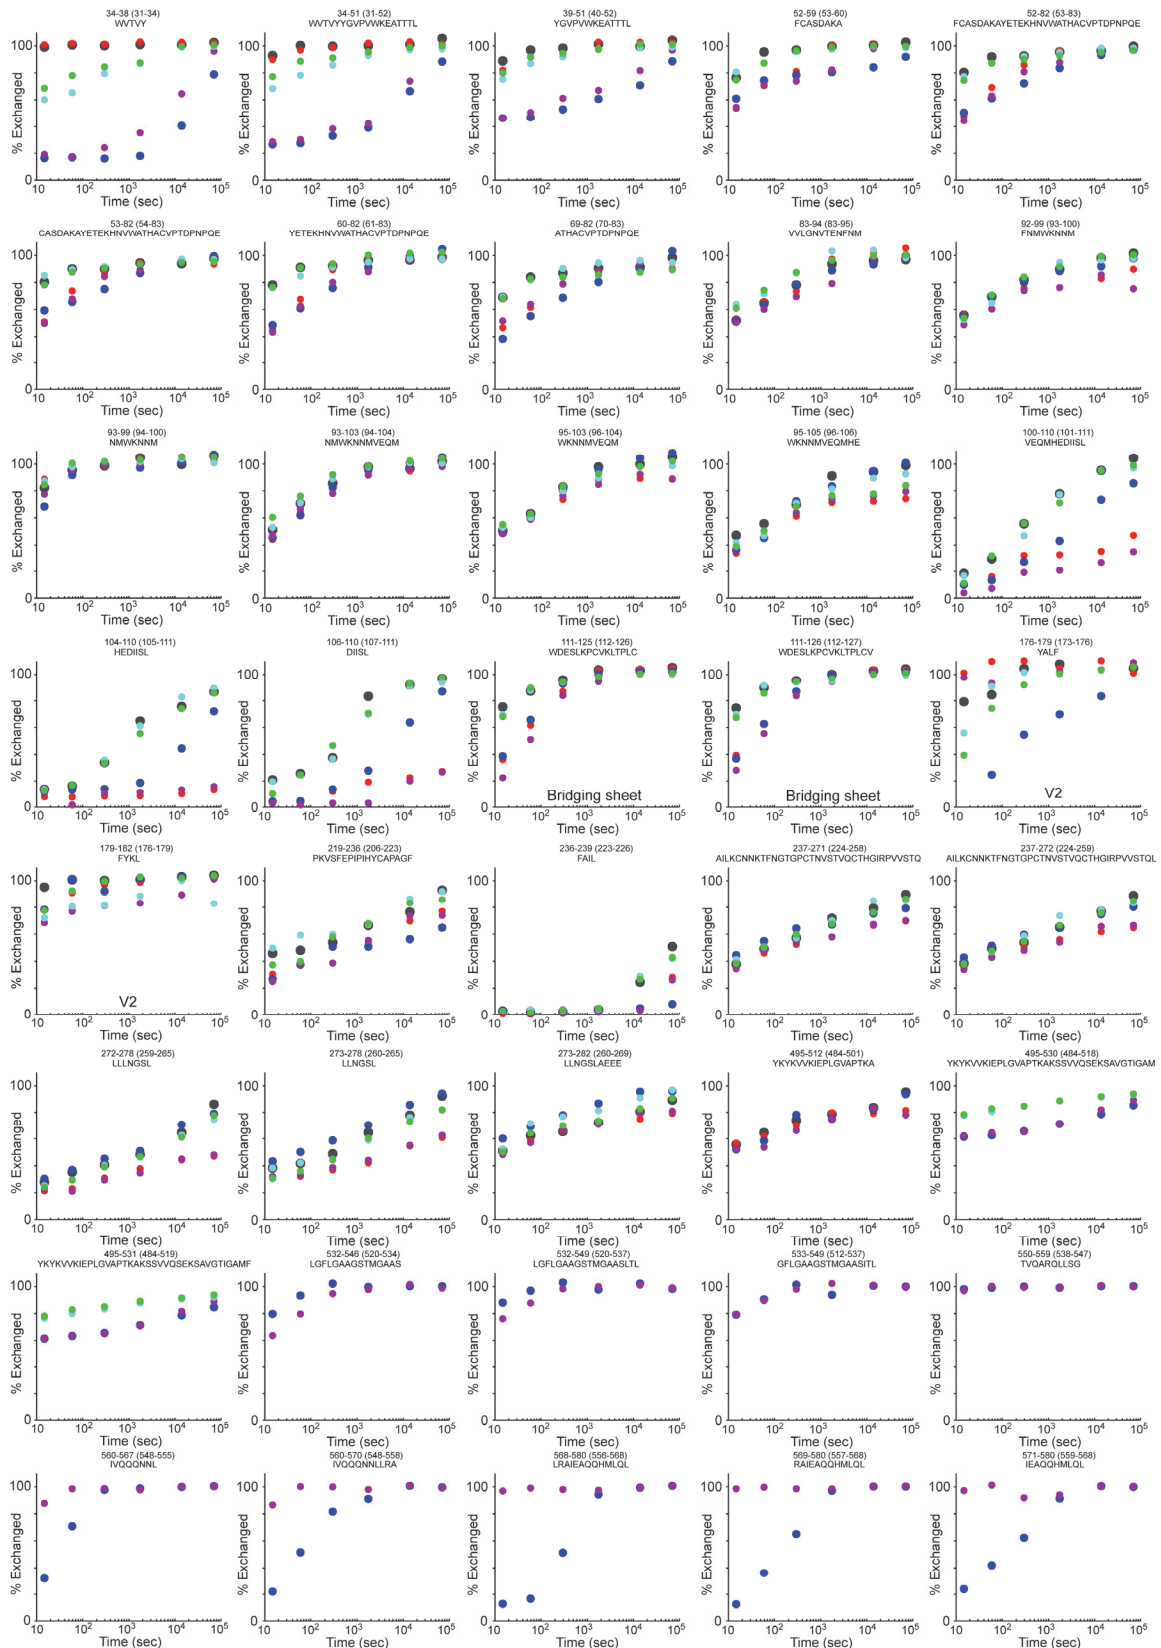

● gp120 mono ● gp140 mono ● gp120 mono + sCD4 ● gp140 mono + sCD4 ● gp140 dimer ● gp140 tetramer

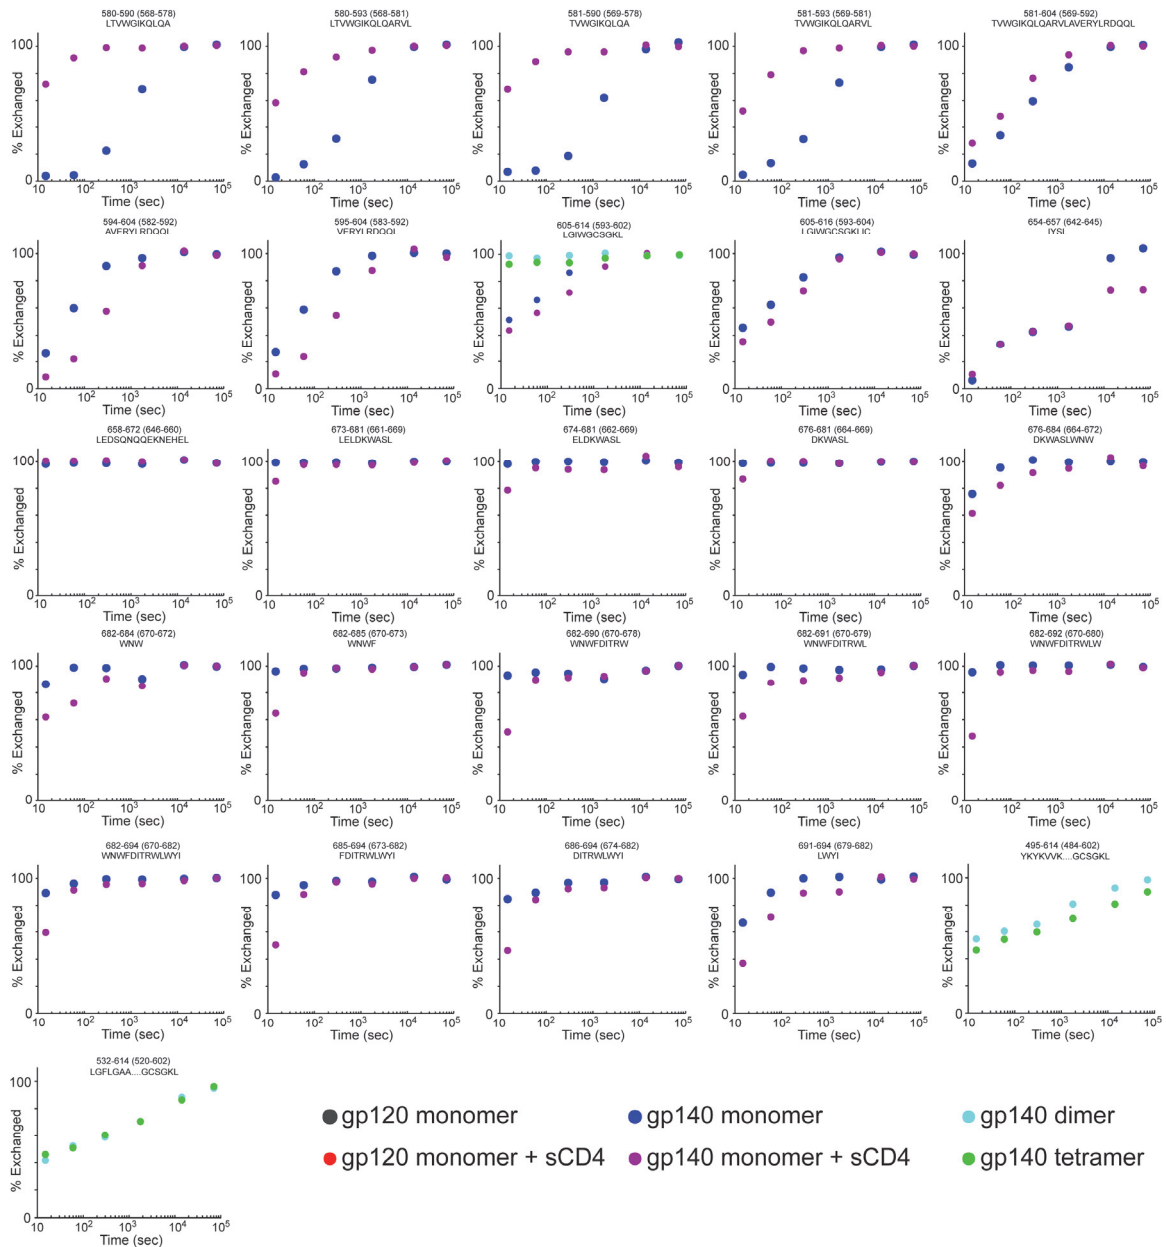

Figure S2: Peptic coverage of gp140 isolate QH0692 (top). Observable fragments are shown as lines under the primary sequence. Segments of the bridging sheet are highlighted in red, and the N-terminal extension in pink. Percent exchange is shown for each peptide in monomeric gp120 (grey), monomeric gp120+sCD4 (red), monomeric gp140 (blue), monomeric gp140+sCD4 (purple), dimeric gp140 (cyan), and tetrameric gp140 (green) as a function of time. Numbering in parenthesis refers to HXB2 numbering.

30 40 50 60  
 A ENLWVTVYYG VPVWKDAETT LFCASDAKAY  
 70 80 90 100 110 120  
 DTEVHNVWAT HACVPTDPNP QEIYMENVTE EFNMWKNNMV EQMHTDIISL WDQSLKPCVQ  
 130 140 V1 150 160 170 V2 180  
 LTPLCVTLDC SYNITNNITN SITNSSVNMR EEIKNC SFNM TTELRDKNRK VYSLFYKLDV  
 190 200 210 220 230 240  
 VQINNGNNSS NLYRLINCNT SALTOACPKV TFEPIPIRYC APAGYAILKC NDKEFNGTGL  
 250 260 270 280 290 300  
 CKNVSTVQCT HGIRPVVSTQ LLLNGSLAEG KVMIRSENIT NNVKNIIVQL NETVTINCTR  
 310 V3 320 330 340 350 360  
 PNNNTRKSVR IGPQGTFYAT GDIIGDIRQA HCNVSGSQWN RALHQVVGQL REYWNTTIIF  
 CD4 bs 380 390 V4 400 410 420  
 KNSSGGDLFI TTHSFNCGGE FFYCNTSGLF NSNWITHNDA SMKPNDTITL PCRIKQIINM  
 430 440 450 460 V5 470 480  
 WQRVGQAIYA PPIQGVIRCE SNITGLILTR DGGGNINESQ IFRPGGGDMR DNWRSELYKY  
 490 500 510 520 530 540  
 KVVRIEPLGV APTKAKRRV V EREKRAVVEL GAVFIGFLGT AGSTMGAASI TLTVQVRKLL  
 550 HR1 560 570 580 590 600  
 SGIVQQQSNL LRAIEAQQHL LKLTVWGIKQ LQARVLAVER YLRDQQLLGI WGCSGKLICT  
 610 620 630 HR2 640 650 660  
 TNVPWNSSWS NKSEREI WEN MTWLQWDKEI SNYTHIIYEL IEESQKQQEK NEQELLELDK  
 670 680 690 700 710 720  
 WANLWNWFDI SNWLWYIKSR IEGRGSGGYI PEAPRDQAY VRKDGEWVLL STFLGHHHHHH

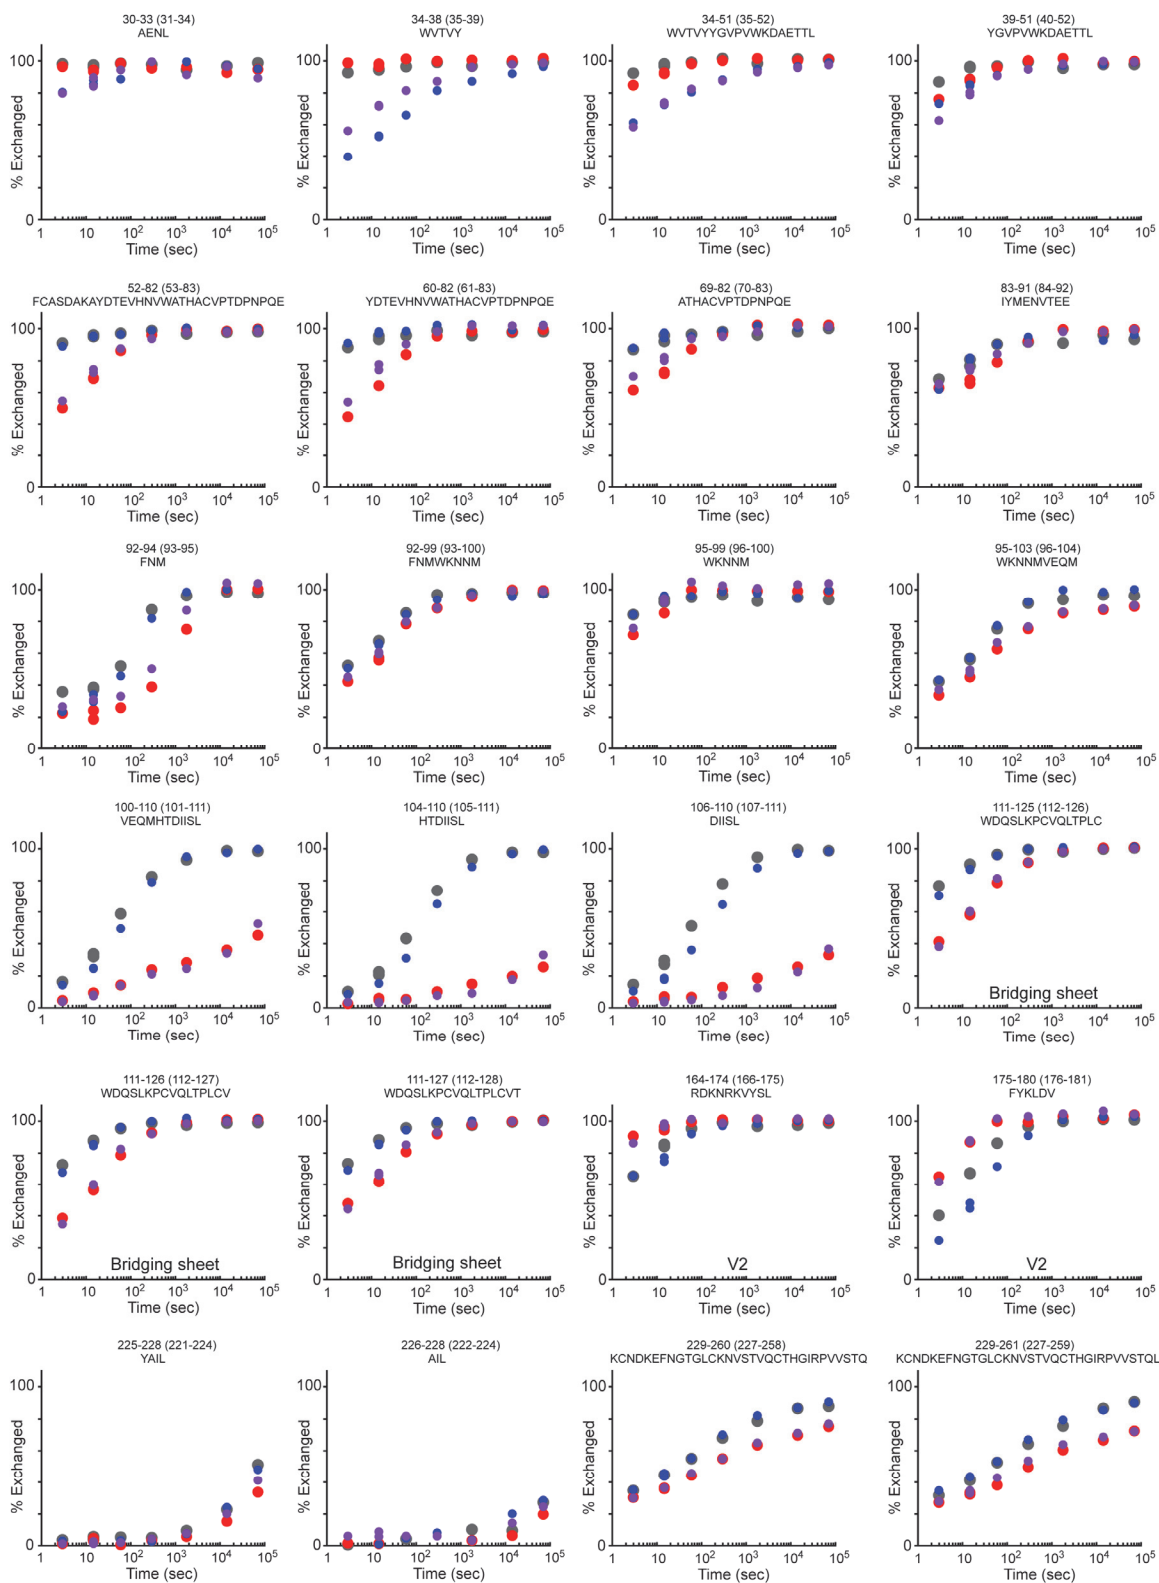

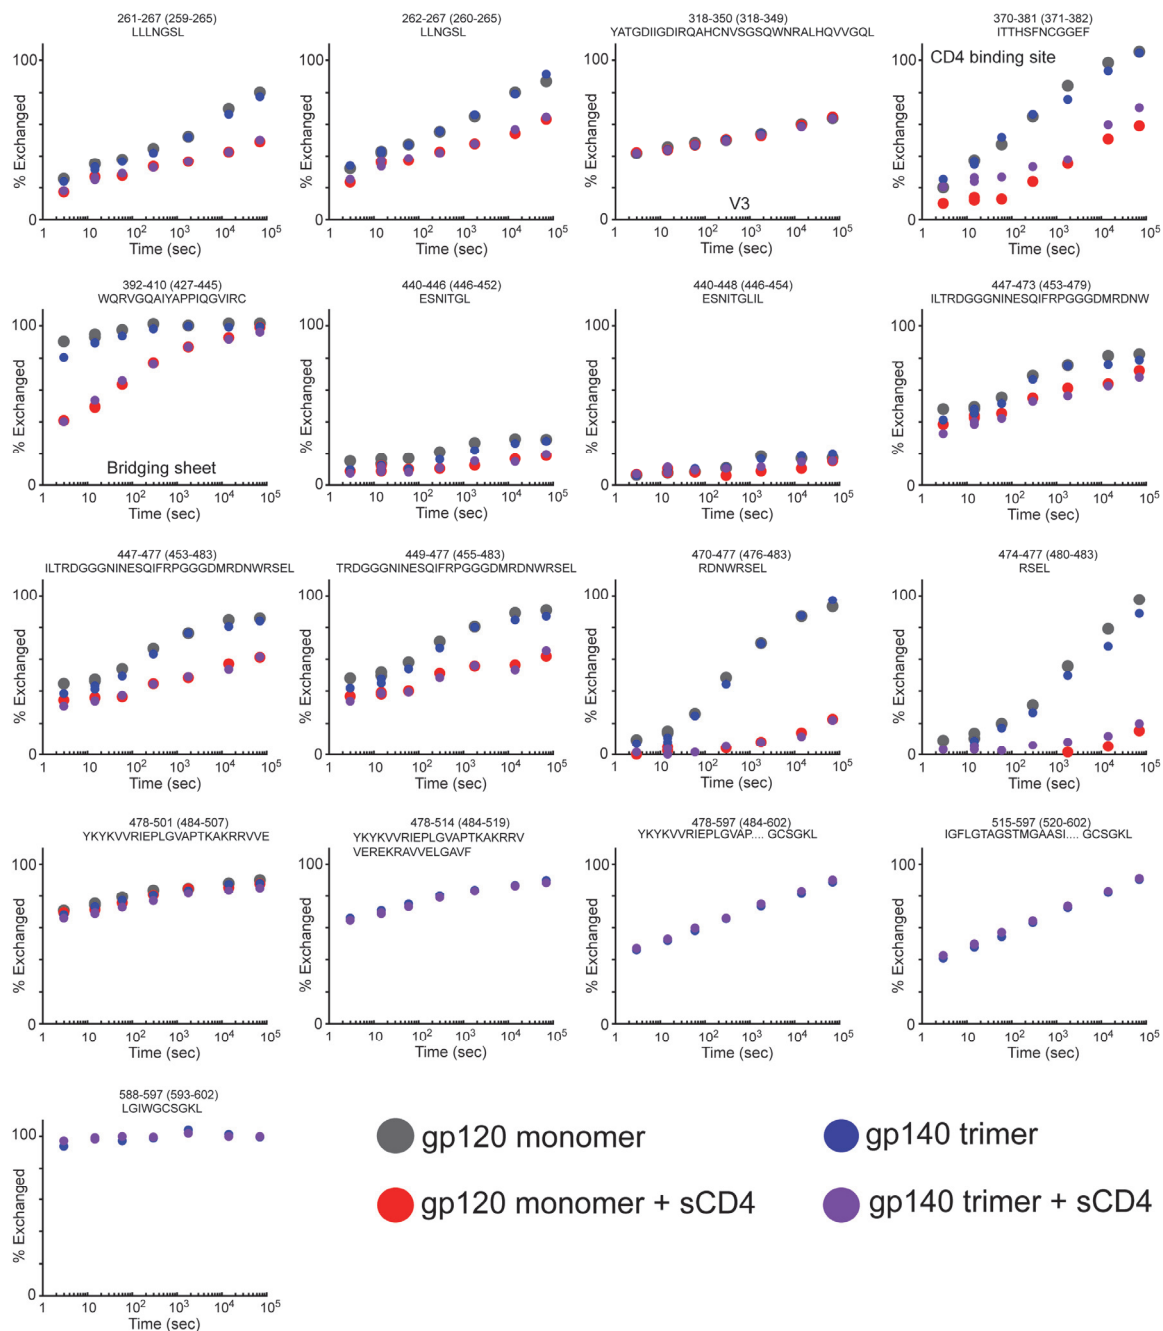

Figure S3. Peptic coverage of gp140 isolate 92UG37 (top). Observable fragments are shown as lines under the primary sequence. Highlighting is described in Figure S1, with the T4 bacteriophage fibrin trimerization motif at the C-terminal end in grey. Percent exchange is shown for each peptide in monomeric gp120 (grey), monomeric gp120+sCD4 (red), trimeric gp140 (blue), and trimeric gp140+sCD4 (purple) as a function of time. Numbering in parenthesis refers to HXB2 numbering.
